# Supplementary material for: Investigation of the antibacterial effect, osteogenic activity, and tracing properties of hydroxyapatite co-doped with Tb3+ and Zn2+
Source: Royal Society of Chemistry journal article supplement (doi:10.1039/d2nr06795a), 2023-01-01
Supplement: d2nr06795a1.pdf [file d2nr06795a1.pdf]

## Supplementary materials

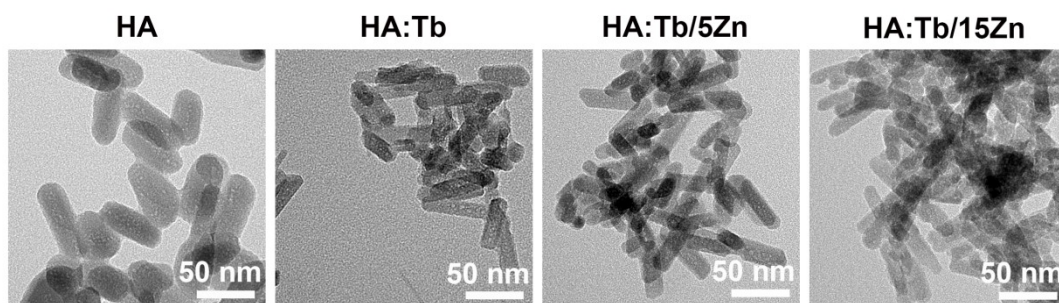

Fig. S1 TEM images of HA, HA:Tb, HA:Tb/5Zn, HA:Tb/15Zn samples.

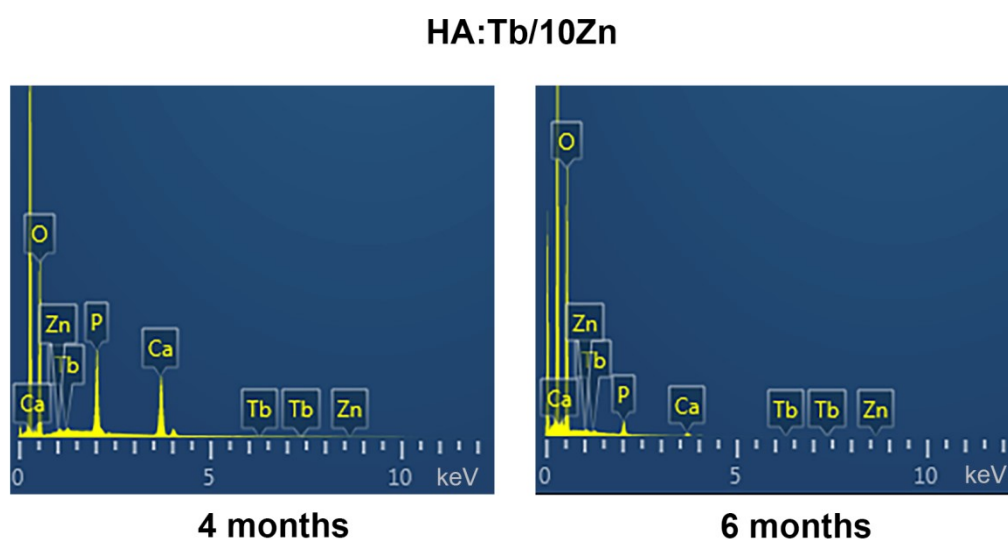

Fig. S2 Element evaluation of HA:Tb/10Zn histological section through EDS.

| Doping content relative to Ca+O+P+Zn+Tb (wt %) |       |                  |
|------------------------------------------------|-------|------------------|
| Samples                                        | Tb    | Zn               |
| HA:Tb/10Zn (4 m)                               | 0.03% | 0.05%            |
| HA:Tb/10Zn (6 m)                               | 0.02% | Lower than 0.01% |

Table S1 The element content of HA:Tb/10Zn histological section samples at 4 months and 6 months.
